# Supplementary material for: High-throughput single-cell transcriptomics reveals the female germline differentiation trajectory in Arabidopsis thaliana
Source: PubMed Central journal article supplement (PMC8486858; doi:10.1038/s42003-021-02676-z), 2021-10-01
Supplement: 42003_2021_2676_MOESM2_ESM.pdf [file 42003_2021_2676_MOESM2_ESM.pdf]

## Description of Additional Supplementary Files

**File name:** Supplementary Data 1

**Description:** ScRNA-seq data metrics.

**File name:** Supplementary Data 2

**Description:** Number of cells in different cell clusters of AC, MMC1 and MMC2 stage samples and AGGR, number of different subclusters in AC.1, MMC1.10, MMC2.6 and AGGR.11 cell clusters.

**File name:** Supplementary Data 3

**Description:** Expression of known marker genes in the cell clusters in the AC, MMC1, MMC2 and AGGR samples and in the subclusters in the AC.1, MMC1.10, MMC2.6 and AGGR.11 cell clusters.

**File name:** Supplementary Data 4

**Description:** Expression of the top 20 feature genes in the cell clusters in the AC, MMC1 and MMC2 samples.

**File name:** Supplementary Data 5

**Description:** Expression and GO analysis of the feature genes of the subclusters in AC.1, MMC1.10 and MMC2.6 cell clusters.

**File name:** Supplementary Data 6

**Description:** Expression of the top20 feature genes in the subclusters in AC.1, MMC1.10, MMC2.6 and AGGR.11 cell clusters.

**File name:** Supplementary Data 7

**Description:** Expression of the feature genes in the AC.1, MMC1.10, MMC2.6 and AGGR.11 subclusters.

**File name:** Supplementary Data 8

**Description:** GO analysis of the feature genes in AC.1-subcluster1, MMC1.10-subcluster3, MMC2.6-subcluster3 and AGGR.11-subcluster2.

**File name:** Supplementary Data 9

**Description:** GO analysis of the feature genes in MMC1.10-subcluster 1, 2 and 4, MMC2.6-subcluster 1, 2 and 4, and AGGR.11-subcluster3.

**File name:** Supplementary Data 10

**Description:** Differentially expressed genes (DEGs) and GO analysis across pseudotime.

**File name:** Supplementary Data 11

**Description:** Differentially expressed genes (DEGs) with branch-specific expression and GO analysis across pseudotime.

**File name:** Supplementary Data 12

**Description:** Transcription factors (TFs) with branch-specific expression across pseudotime.

**File name:** Supplementary Data 13

**Description:** The Top100 Differentially expressed genes (DEGs) of AGGR.11 across pseudotime.

**File name:** Supplementary Data 14

**Description:** List of primers used in this study.
